# Supplementary figures and images for: Daylight savings time and myocardial infarction
Source: PubMed Central journal article supplement — Open Heart. 2014 Mar 28;1(1):e000019. doi: 10.1136/openhrt-2013-000019 (PMC4189320; doi:10.1136/openhrt-2013-000019), 2014-03-28

Supplemental Figure 1: Evaluation of normality for AR(7) model.

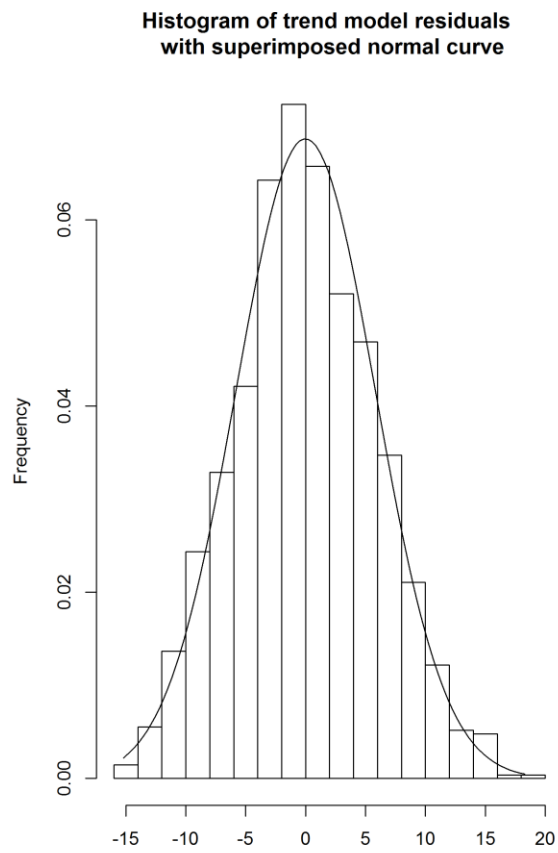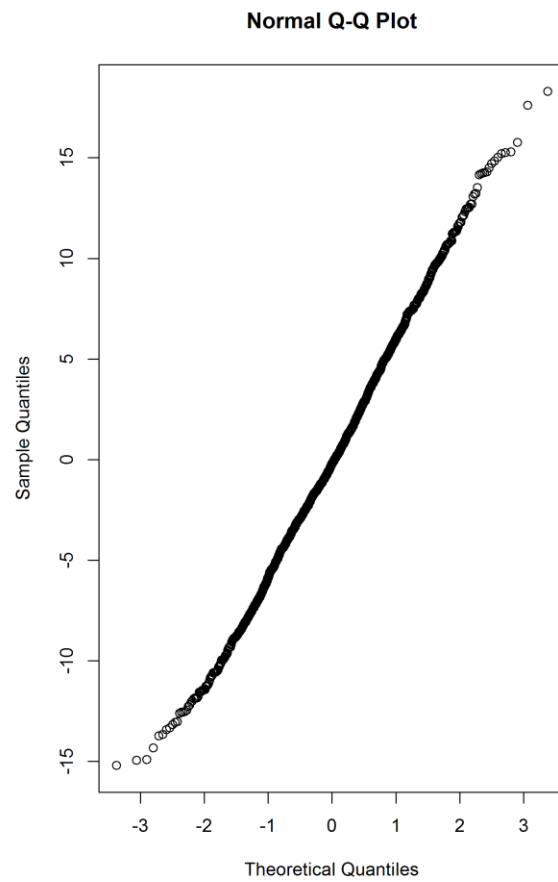

Supplement: openhrt-2013-000019-s1.pdf [file openhrt-2013-000019-s1.pdf]
